# Supplementary material for: Somite morphogenesis is required for axial blood vessel formation during zebrafish embryogenesis
Source: eLife. 2022 Feb 9;11:e74821. doi: 10.7554/eLife.74821 (PMC8863375; doi:10.7554/eLife.74821)
Supplement: Figure 1—source data 1. [file elife-74821-fig1-data1.csv]

	Wild Type Averages (Fluorescence at midline)	aldh1a2 -/- Averages (Fluorescence at midline)	Wild Type Standard Deviations	aldh1a2 -/- Standard Deviation
0 hours	0	0	0	0
1hours	28	2.285714286	11.44552314	1.112697281
2hours	47.71428571	5.428571429	10.3394759	2.819996623
3hours	62	10.85714286	7.187952884	6.148944935
4 hours	74.28571429	19.28571429	6.369570517	10.01189768
