# Supplementary material for: Somite morphogenesis is required for axial blood vessel formation during zebrafish embryogenesis
Source: eLife. 2022 Feb 9;11:e74821. doi: 10.7554/eLife.74821 (PMC8863375; doi:10.7554/eLife.74821)
Supplement: Figure 1—source data 2. [file elife-74821-fig1-data2.csv]

	DMSO Percentage	Exogenous RA Percentage	DMSO Standard Deviation	Exogenous RA Standard Deviations
0 hours	4.906339924	55.31726	3.568707384	12.98115977
1hours	34.37589659	83.60356229	13.08074233	7.567163464
2hours	64.4605971	91.99565711	14.89006806	4.364672047
3hours	82.08444795	93.02666962	7.276201443	4.592551911
4 hours	87.67797242	93.37530806	7.237018308	3.948451377
