# Supplementary material for: Somite morphogenesis is required for axial blood vessel formation during zebrafish embryogenesis
Source: eLife. 2022 Feb 9;11:e74821. doi: 10.7554/eLife.74821 (PMC8863375; doi:10.7554/eLife.74821)
Supplement: Figure 2—source data 1. [file elife-74821-fig2-data1.csv]

	Wt -> Wt	dnRAR -> WT
Percentage of fluorescence at midline	74.3322	54.55005
	86.67225	58.852
	81.22384	80.60632
	70.27393	66.13832
	89.91181	55.45595
	90.72492	58.05061
	84.22147	56.55424
	65.58977	52.89237
	73.9183	41.56304
	89.20281
