# Supplementary material for: Somite morphogenesis is required for axial blood vessel formation during zebrafish embryogenesis
Source: eLife. 2022 Feb 9;11:e74821. doi: 10.7554/eLife.74821 (PMC8863375; doi:10.7554/eLife.74821)
Supplement: Figure 2—source data 2. [file elife-74821-fig2-data2.csv]

	Wt -> Wt	dnRAR -> WT
Percentage of fluorescence at midline	71.84146	71.6207
	94.3574	81.40751
	91.65362	84.79395
	76.88415	81.08192
	84.76805	84.60864
	88.26551	73.50042
