# Supplementary material for: Somite morphogenesis is required for axial blood vessel formation during zebrafish embryogenesis
Source: eLife. 2022 Feb 9;11:e74821. doi: 10.7554/eLife.74821 (PMC8863375; doi:10.7554/eLife.74821)
Supplement: Figure 4—source data 1. [file elife-74821-fig4-data1.csv]

	DMSO Embryo Notochord to Endoderm	DMSO Embryo Notochord to Endoderm	DMSO Embryo Notochord to Endoderm	DMSO Embryo Notochord to Endoderm	DMSO Embryo Notochord to Endoderm	DMSO Embryo Notochord to Endoderm	DMSO Embryo Notochord to Endoderm	DMSO Embryo Notochord to Endoderm	DMSO Embryo Notochord to Endoderm	DMSO Embryo Notochord to Endoderm	aldh1a2 -/- Embryo Notochord to Endoderm	aldh1a2 -/- Embryo Notochord to Endoderm	aldh1a2 -/- Embryo Notochord to Endoderm	aldh1a2 -/- Embryo Notochord to Endoderm	aldh1a2 -/- Embryo Notochord to Endoderm	aldh1a2 -/- Embryo Notochord to Endoderm	aldh1a2 -/- Embryo Notochord to Endoderm	aldh1a2 -/- Embryo Notochord to Endoderm	aldh1a2 -/- Embryo Notochord to Endoderm	aldh1a2 -/- Embryo Notochord to Endoderm	0.1 um RA Embryo Notochord to Endoderm	0.1 um RA Embryo Notochord to Endoderm	0.1 um RA Embryo Notochord to Endoderm	0.1 um RA Embryo Notochord to Endoderm	0.1 um RA Embryo Notochord to Endoderm	0.1 um RA Embryo Notochord to Endoderm	0.1 um RA Embryo Notochord to Endoderm	0.1 um RA Embryo Notochord to Endoderm	0.1 um RA Embryo Notochord to Endoderm	0.1 um RA Embryo Notochord to Endoderm
0 mins	0	0	0	0	0	0	0				0	0	0	0	0	0	0	0	0		51	57	51	51	54	42	48	45
150 mins	84	48	44	64	56	64	38				0	0	0	25	0	0	0	0	0		78	87	84	75	78	69	75	69
250 mins	87	76	56	92	88	84	93				61	34	55	67	14	24	40	48	44		90	108	99	99	90	93	84	87
