# Supplementary material for: Somite morphogenesis is required for axial blood vessel formation during zebrafish embryogenesis
Source: eLife. 2022 Feb 9;11:e74821. doi: 10.7554/eLife.74821 (PMC8863375; doi:10.7554/eLife.74821)
Supplement: Figure 5—source data 1. [file elife-74821-fig5-data1.csv]

	Distance of Notochord to Endoderm (Microns)	Percentage Migration (Individual Embryos)	Y	Y	Y	Y	Y	Y	Y
1
2
3		0
4		0
5		0
6		0
7		0
8		0
9		0
10		0
11
12
13
14
15
16
17
18
19
20
21
22
23
24		16.4
25
26
27
28
29
30
31
32		54.22856
33
34
35
36
37
38
39
40
41
42
43
44
45
46		87.37698
47		46
48
49
50
51		81.48778
52		82.71629
53		80.31769
54
55		91.50745
56		60.6807
57
58
59
60
