# Supplementary material for: Somite morphogenesis is required for axial blood vessel formation during zebrafish embryogenesis
Source: eLife. 2022 Feb 9;11:e74821. doi: 10.7554/eLife.74821 (PMC8863375; doi:10.7554/eLife.74821)
Supplement: Figure 5—source data 2. [file elife-74821-fig5-data2.csv]

	Notochord to Ventral Endoderm (microns)	Percentage Migration (Individual Embryos)	Percentage Migration (Individual Embryos)	Percentage Migration (Individual Embryos)	Percentage Migration (Individual Embryos)	Percentage Migration (Individual Embryos)	Y	Y	Y
1
2
3					0
4		0		0	0	0
5		0		0	0
6		0	0	0	16
7		0
8
9		0
10
11		0
12		0
13
14
15
16
17
18
19
20
21
22
23
24
25
26
27
28
29
30
31
32
33
34
35
36
37
38
39
40
41
42
43
44
45
46
47
48
49
50
51
52
53
54
55
56
57
58
59
60
61
