# Supplementary material for: Somite morphogenesis is required for axial blood vessel formation during zebrafish embryogenesis
Source: eLife. 2022 Feb 9;11:e74821. doi: 10.7554/eLife.74821 (PMC8863375; doi:10.7554/eLife.74821)
Supplement: Figure 6—source data 1. [file elife-74821-fig6-data1.csv]

	Nuclei Count	Nuclei Count	Nuclei Count	Nuclei Count	Nuclei Count	Nuclei Count	Nuclei Count	Nuclei Count	Nuclei Count	Nuclei Count	Nuclei Count	Nuclei Count	Nuclei Count	Nuclei Count
WT artery	41	47	61	49	64	47	52	51	50	52	44	51
DEAB Artery	23	54	41	27	54	35	33	24	46	26	24	40
WT Vein	18	32	28	35	17	27	35	38	39	25	26	31
DEAB Vein	25	62	52	35	57	60	56	23	44	47	29	43
