# Supplementary material for: Somite morphogenesis is required for axial blood vessel formation during zebrafish embryogenesis
Source: eLife. 2022 Feb 9;11:e74821. doi: 10.7554/eLife.74821 (PMC8863375; doi:10.7554/eLife.74821)
Supplement: Figure 7—source data 1. [file elife-74821-fig7-data1.csv]

	Displacement	Displacement	Displacement	Displacement	Displacement	Displacement	Displacement	Displacement	Displacement	Displacement	Displacement	Displacement	Displacement	Displacement	Displacement	Displacement	Displacement	Displacement	Displacement	Displacement	Displacement	Displacement	Displacement	Displacement	Displacement	Displacement	Displacement	Displacement	Displacement	Displacement	Displacement	Displacement	Displacement	Displacement	Displacement	Displacement	Displacement	Displacement	Displacement	Displacement	Displacement	Displacement	Displacement	Displacement	Displacement	Displacement	Displacement	Displacement	Displacement
DMSO	63.761	78.185	53.956	21.455	77.536	35.962	36.662		42.884	51.909	72.34	40.616	32.717			82.588	43.529	66.714	61.705	38.663	24.333		89.169	65.62	26.16	43.943	69.648	41.755	30.074	43.006	57.484	53.941	89.272	57.83	31.42	42.588	19.526	43.41		48.622	61.434	45.287	59.341	55.678	54.415	35.682
DEAB	3.972	27.478	33.832	41.332	37.5	61.281	39.455	36.097	17.18	28.5	39.799	34.635	9.834		17.709	39.746	14.157	10.904	41.724	17.815	10.73	19.258		25.329	33.742	9.195	30.808	20.713	39.961	12.386	32.046	70.253	22.152	12.894	7.529	34.52	37.839	10.123	25.713	35.58	20.731		6.396	17.308	40.823	9.986	10.892	21.395	45.667
[truncated: 1 more columns]
