# Supplementary material for: Somite morphogenesis is required for axial blood vessel formation during zebrafish embryogenesis
Source: eLife. 2022 Feb 9;11:e74821. doi: 10.7554/eLife.74821 (PMC8863375; doi:10.7554/eLife.74821)
Supplement: Figure 7—source data 2. [file elife-74821-fig7-data2.csv]

	Speed of Nuclei	Speed of Nuclei	Speed of Nuclei	Speed of Nuclei	Speed of Nuclei	Speed of Nuclei	Speed of Nuclei	Speed of Nuclei	Speed of Nuclei	Speed of Nuclei	Speed of Nuclei	Speed of Nuclei	Speed of Nuclei	Speed of Nuclei	Speed of Nuclei	Speed of Nuclei	Speed of Nuclei	Speed of Nuclei	Speed of Nuclei	Speed of Nuclei	Speed of Nuclei	Speed of Nuclei	Speed of Nuclei	Speed of Nuclei	Speed of Nuclei	Speed of Nuclei	Speed of Nuclei	Speed of Nuclei	Speed of Nuclei	Speed of Nuclei	Speed of Nuclei	Speed of Nuclei	Speed of Nuclei	Speed of Nuclei	Speed of Nuclei	Speed of Nuclei	Speed of Nuclei	Speed of Nuclei	Speed of Nuclei	Speed of Nuclei	Speed of Nuclei	Speed of Nuclei	Speed of Nuclei	Speed of Nuclei	Speed of Nuclei	Speed of Nuclei	Speed of Nuclei	Speed of Nuclei	Speed of Nuclei
DMSO	6.638	7.031	6.62	6.896	7.753	9.133	5.84		8.216	7.867	9.486	8.44	8.457			7.826	7.795	8.69	7.819	7.71	7.884		6.729	6.313	7.01	7.787	8.009	6.437	5.697	7.121	5.282	7.072	8.101	6.998	5.568	7.681	5.389	7.592		8.612	10.916	10.63	8.024	8.775	8.239	9.029
DEAB	6.069	6.286	5.872	6.073	6.428	6.554	4.978	8.055	4.557	5.517	6.378	6.202	3.705		8.615	6.142	7.13	6.277	7.684	7.898	7.925	8.084		7.319	7.256	6.336	7.393	7.492	9.037	7.957	10.091	7.936	6.802	12.064	7.581	9.955	6.927	9.569	8.529	8.317	7.531		5.23	5.847	7.18	4.997	5.395	5.137	6.86
[truncated: 1 more columns]
