# Supplementary material for: Somite morphogenesis is required for axial blood vessel formation during zebrafish embryogenesis
Source: eLife. 2022 Feb 9;11:e74821. doi: 10.7554/eLife.74821 (PMC8863375; doi:10.7554/eLife.74821)
Supplement: Figure 7—source data 3. [file elife-74821-fig7-data3.csv]

	Time	Ratios of Ventral Expansion over NES	Ratios of Ventral Expansion over NES	Ratios of Ventral Expansion over NES	Ratios of Ventral Expansion over NES	Ratios of Ventral Expansion over NES	Ratios of Ventral Expansion over NES	Ratios of Ventral Expansion over NES	Ratios of Ventral Expansion over NES	Ratios of Ventral Expansion over NES	Ratios of Ventral Expansion over NES
Hour 1	1:00:00	1	1	1.25	1.333333	0.8	0.769231	1.1	1.25	1	0.909091
Hour 2	2:00:00	1.352941	1.166667	1.111111	1	1.043478	0.941176	0.875	1.195652	1	1
Hour 3	3:00:00	1.333333	1.125	1	1	0.885714	0.866667	0.894737	1.192308	1	1.043478
Hour 4	4:00:00	1.205882	1.111111	0.863636	0.888889	1	0.945946	0.806452	1.25	1.16	1.033333
Hour 5	5:00:00	1.121951	1.2	0.888889	1.166667	1.068182	1	0.871795	1.311475	1.192308	0.918919
