# Supplementary material for: Somite morphogenesis is required for axial blood vessel formation during zebrafish embryogenesis
Source: eLife. 2022 Feb 9;11:e74821. doi: 10.7554/eLife.74821 (PMC8863375; doi:10.7554/eLife.74821)
Supplement: Figure 7—source data 4. [file elife-74821-fig7-data4.csv]

	Distance of notochord to ventral somite (microns)	Percentage of Angioblast Migration at midline (Individual Embryos)
1
2		0
3		0
4
5		0
6		0
7		0
8
9		0
10		0
11
12
13
14
15
16		29.09833
17
18
19
20
21
22
23
24
25
26
27
28
29
30		80.31769
31		74.8794
32		80.47743
33		64.85884
34		87.37698
35
36
37		46.14452
38		54.933
39		54.933
40
41
42
43
44
45
46
47
48
49
50
51
52
53
54
55
56
57
58
59
60
